# Supplementary material
Source: MDPI journal article supplement (https://www.mdpi.com/2073-431X/12/7/146)
Supplement: s1 [file s1]

**Article Title:** Exploring the Landscape of Data Analysis: A Review of its Application and Impact in Ecuador

**Journal Name:** Computers

**Author Names:** Manuel Ayala-Chauvin, Fátima Avilés-Castillo, Jorge Buele.

**Supplement Table S1.** Databases and Search Terms Used

| N°           | MESH/search terms                                                                                                    | Total        |        |             |                |     |      |
|--------------|----------------------------------------------------------------------------------------------------------------------|--------------|--------|-------------|----------------|-----|------|
|              |                                                                                                                      | SpringerLink | Scopus | IEEE Xplore | Web of Science | ACM |      |
| 1            | "Big Data" AND Ecuador                                                                                               | 662          | 32     | 59          | 251            | 26  | 1030 |
| 2            | "Big Data" AND Hadoop AND Ecuador                                                                                    | 30           | 2      | 5           | 12             | 11  | 60   |
| 3            | "big data" AND ((industry OR manufactur*) OR (education OR student or research) OR (Society or govern*)) AND Ecuador | 655          | 19     | 14          | 270            | 1   | 962  |
| 4            | "big data" AND "data mining" AND companies OR e-government                                                           | 474          | 1      | 85          | 126            | 2   | 688  |
| <b>Total</b> |                                                                                                                      | 1821         | 54     | 163         | 659            | 40  | 2740 |
